# Supplementary material for: Unveiling the enhanced photoelectrochemical and photocatalytic properties of reduced graphene oxide for photodegradation of methylene blue dye
Source: Royal Society of Chemistry journal article supplement (doi:10.1039/d0ra06703b), 2020-01-01
Supplement: d0ra06703b1.pdf [file d0ra06703b1.pdf]

## Supplementary Information

of

### Unveiling the enhanced photoelectrochemical and photocatalytic properties of reduced graphene oxide for photodegradation of methylene blue dye

Valerie Ling Er Siong<sup>a</sup>, Xin Hong Tai<sup>a</sup>, Kian Mun Lee<sup>a</sup>, Joon Ching Juan<sup>a</sup>, Chin Wei Lai<sup>a\*</sup>

<sup>a</sup>Nanotechnology & Catalysis Research Centre (NANOCAT), Institute for Advanced Studies (IAS), University of Malaya, Kuala Lumpur, Malaysia.

\*corresponding author: [cwlai@um.edu.my](mailto:cwlai@um.edu.my)

### Description of Supplementary Information

**Fig. S1.** Light spectrum of UV-C light source for photodegradation experiment.

**Fig. S2.** Tauc plot for indirect band gap of G-0 to G-8.

**Fig. S3.** 50 ppm MB for photolysis, and dark adsorption by G-0 to G-8.

**Fig. S4.** Time-dependent UV-Vis absorption spectra for photodegradation of 50 ppm MB from time 0 to 6 h by (a) G-0, (b) G-1, (c) G-2, (d) G-4, and (e) G-8.

**Eqn (S1).** Conversion of vs. Ag/AgCl pH 6.5 to vs. NHE pH 7.0.

**Eqn (S2).** Calculation of acceptor charge density of p-type semiconductor.

**Eqn (S3).** Calculation of conduction band potential.

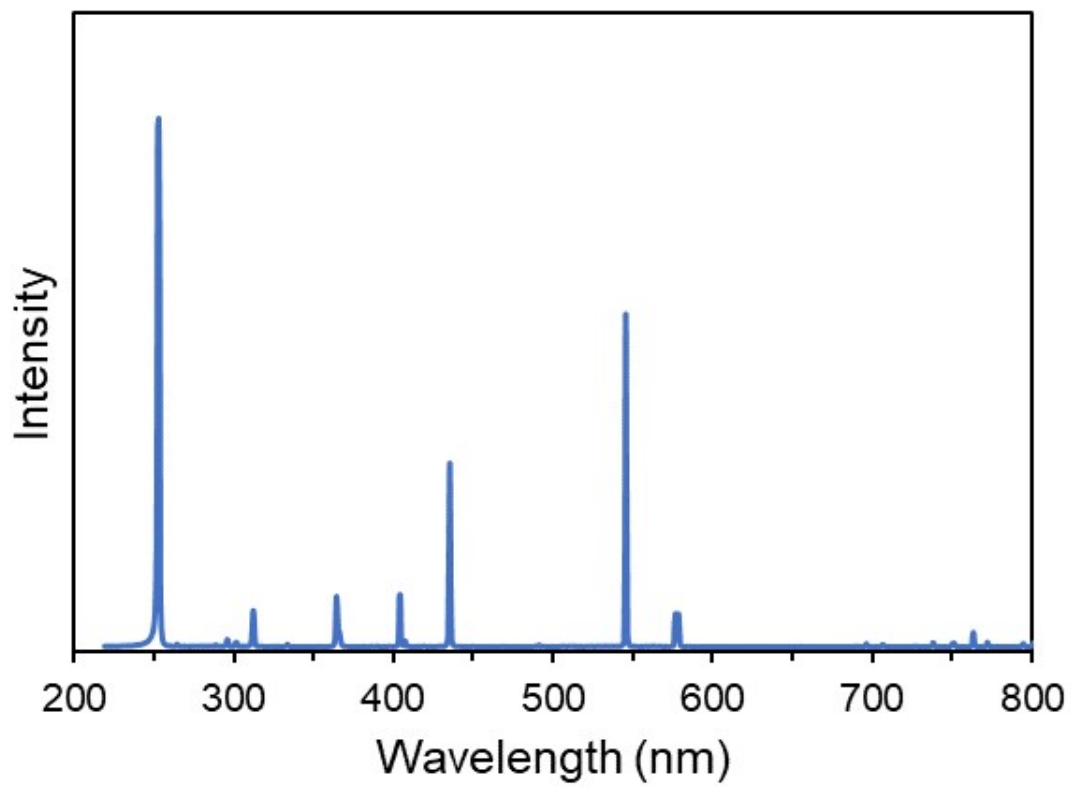

**Fig. S1.** Light spectrum of UV-C light source for photodegradation experiment.

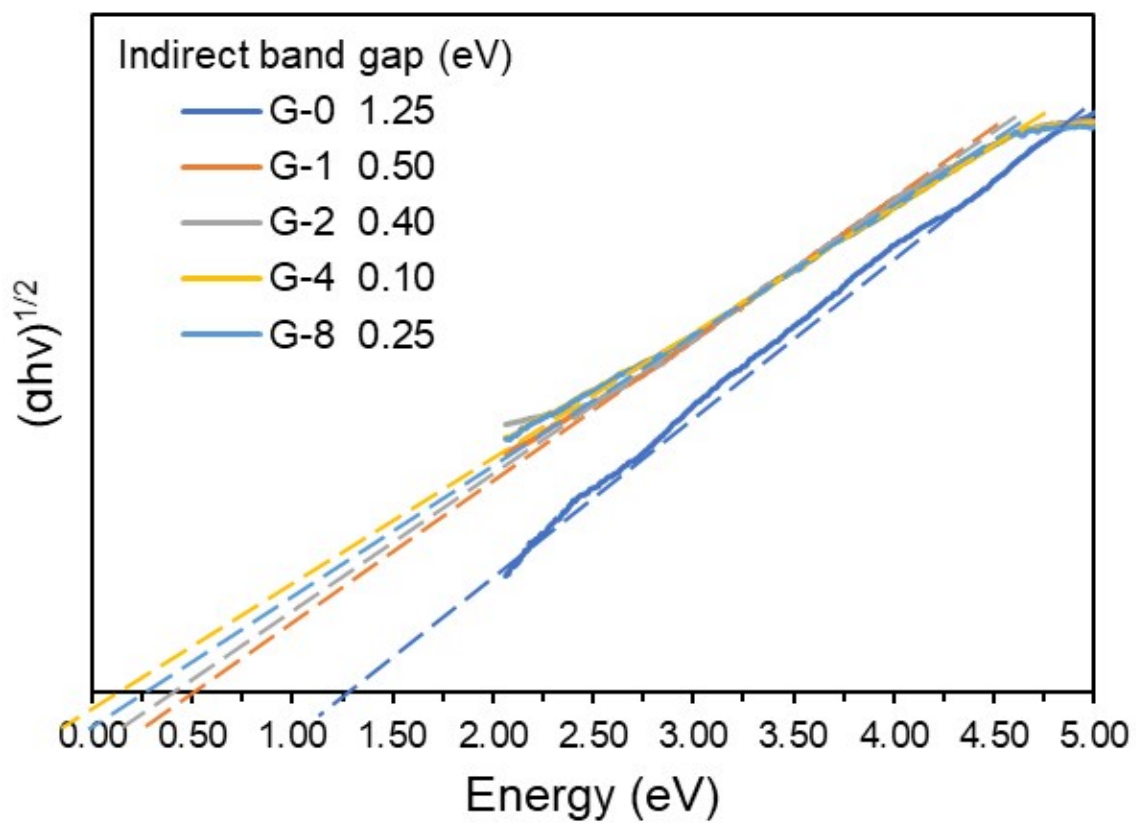

**Fig. S2.** Tauc plot for indirect band gap of G-0 to G-8.

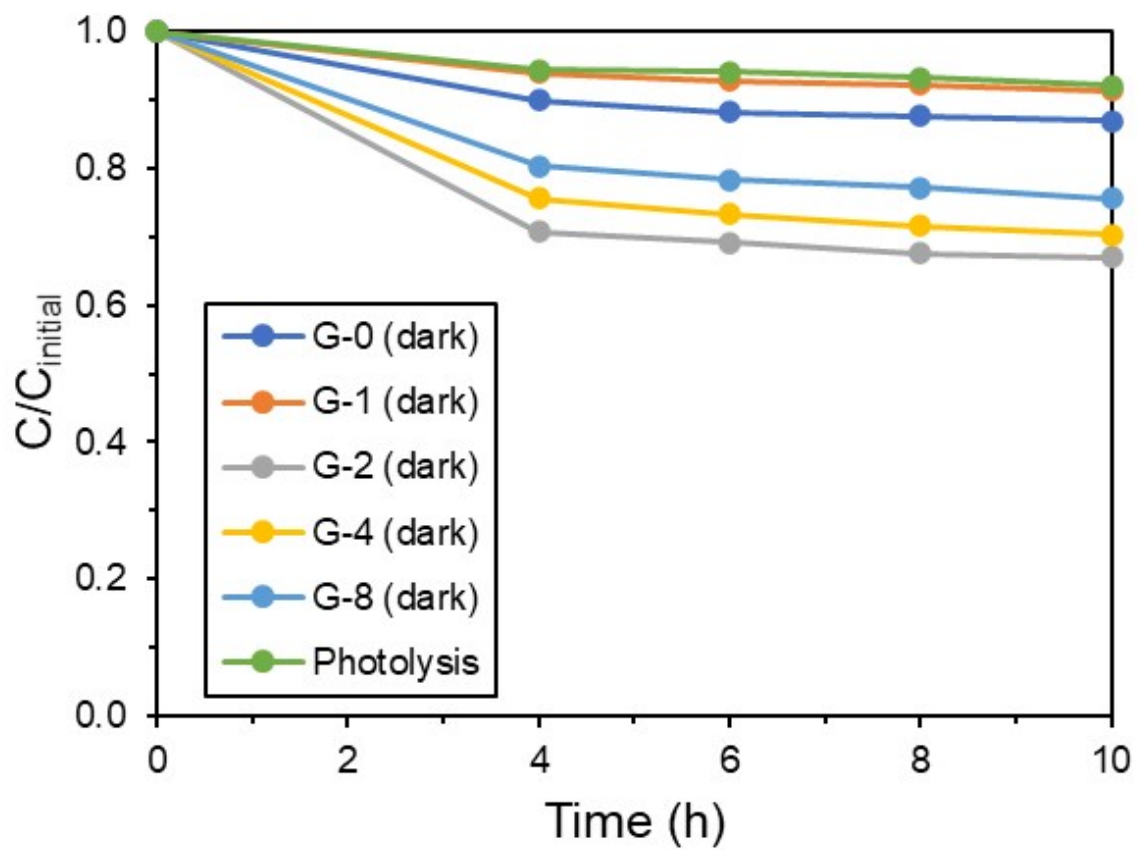

**Fig. S3.** 50 ppm MB for photolysis, and dark adsorption by G-0 to G-8.

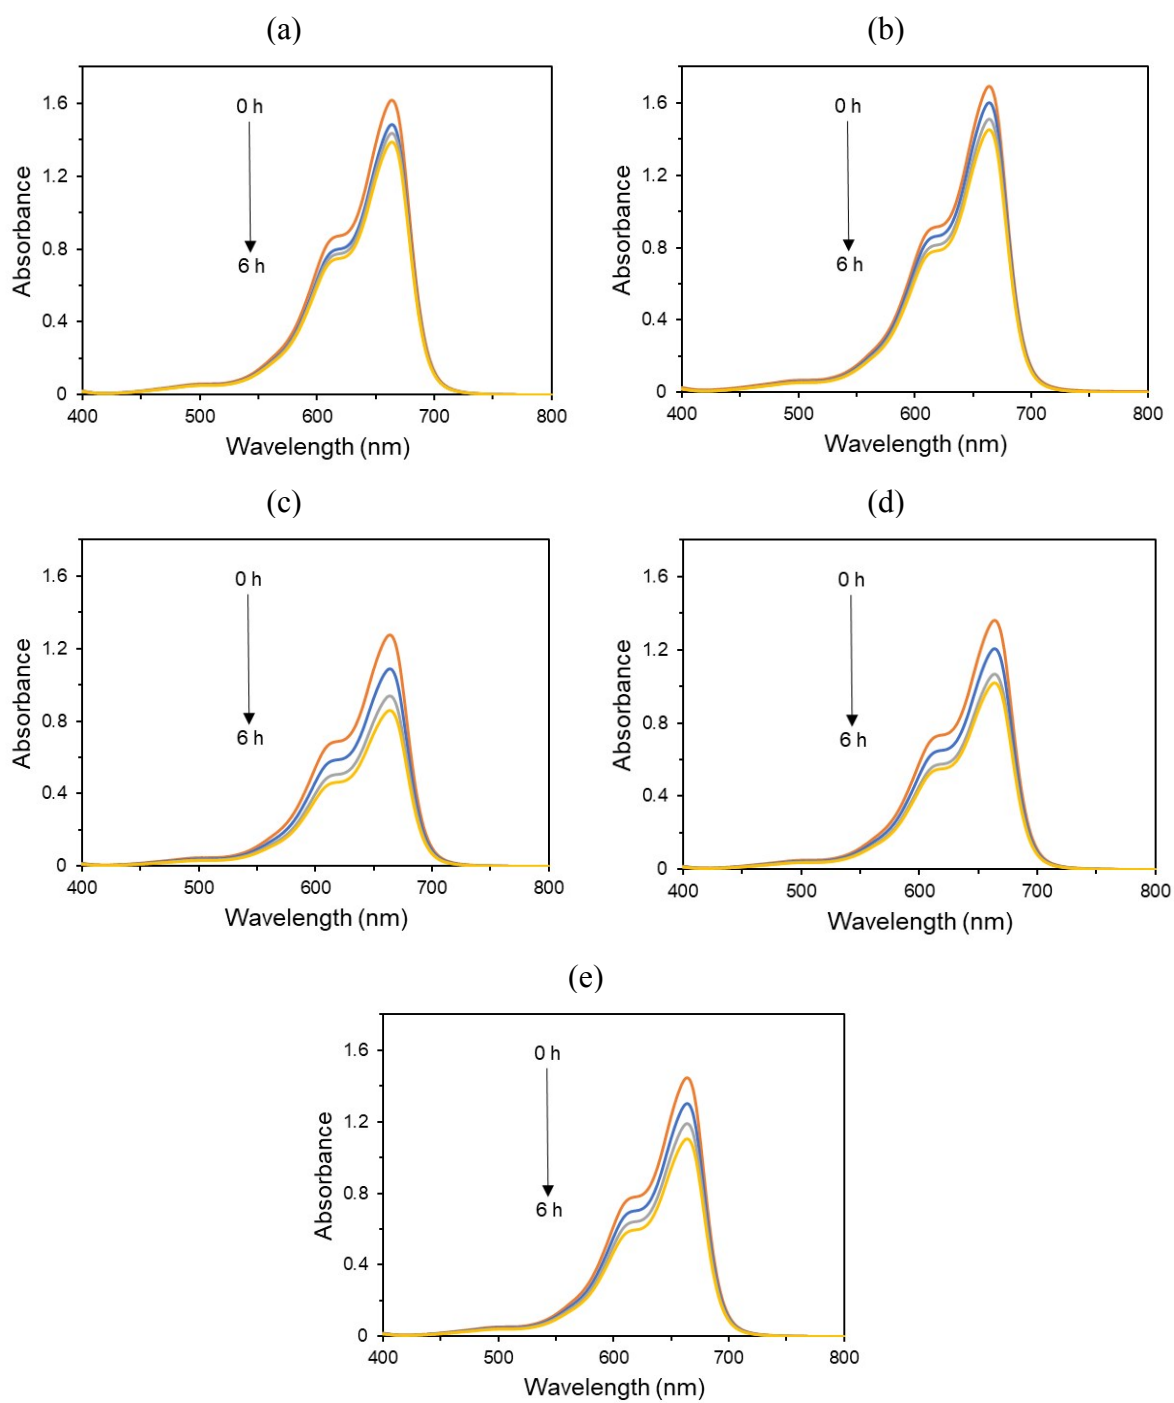

**Fig. S4.** Time-dependent UV-Vis absorption spectra for photodegradation of 50 ppm MB from time 0 to 6 h by (a) G-0, (b) G-1, (c) G-2, (d) G-4, and (e) G-8.

**Eqn (S1).** Conversion of vs. Ag/AgCl pH 6.5 to vs. NHE pH 7.0.

Conversion of potential, E from versus Ag/AgCl (pH 6.5) to versus normal hydrogen electrode (NHE, pH 7) [1].

$$E_{NHE, pH 7} = E_{(Ag/AgCl\ pH\ 6.5)} + 0.21 - 0.059 \times (7.0 - 6.5) \quad (S1)$$

**Eqn (S2).** Calculation of acceptor charge density of p-type semiconductor.

$$\begin{aligned}\frac{1}{C^2} &= \frac{2}{e\epsilon_0\epsilon N_A} \left[ (-V + E_{FB}) - \frac{kT}{e} \right] \\ \frac{1}{C^2} &= \frac{2}{e\epsilon_0\epsilon N_A} [-V + E_{FB}] \\ \frac{1}{C^2} & \\ -\frac{1}{dV} &= \frac{2}{e\epsilon_0\epsilon N_A} \\ -\text{gradient} &= \frac{2}{e\epsilon_0\epsilon N_A} \\ N_A &= -\frac{2}{e\epsilon_0\epsilon(\text{gradient})}\end{aligned}\tag{S2}$$

The value of  $\frac{kT}{e}$  is negligibly small at room temperature [2]. The M-S plot is  $1/C^2$  (y-axis)

versus V (x-axis), hence  $\frac{1}{C^2}$  is equal to the gradient  $\left(\frac{dy}{dx}\right)$  of the slope.

Where:

$C$  = capacitance

$e$  = electron charge ( $1.602 \times 10^{-19} C$ )

$\epsilon_0$  = permittivity of vacuum ( $8.854 \times 10^{-12} F m^{-1}$ )

$\epsilon$  = dielectric constant of the GO ( $\sim 1000$  [3]).

$V$  = applied bias potential

$E_{FB}$  = flat band potential

$k$  = Boltzmann constant

$T$  = temperature

$N_A$  = acceptor/hole density

Therefore,

$$\text{Gradient}_{G-0} = -1.52 \times 10^{11} F^{-2} cm^4 V^{-1}$$

$$N_{A_{G-0}} = 9.28 \times 10^{15} cm^{-3}$$

$$\text{Gradient}_{G-2} = -1.22 \times 10^{11} \text{ F}^{-2} \text{ cm}^4 \text{ V}^{-1}$$

$$N_{A_{G-2}} = 1.16 \times 10^{16} \text{ cm}^{-3}$$

**Eqn (S3).** Calculation of conduction band potential.

$$E_{CB} = E_{VB} - E_{BG} \quad (\text{S3})$$

Where,

$E_{CB}$  = Conduction band potential (V)

$E_{VB}$  = Valence band potential (V)

$E_{BG}$  = Band gap energy (eV)

Thus,

$$E_{CB_{G-0}} = 2.23 - 3.75 = -1.52 \text{ V}$$

$$E_{CB_{G-2}} = 2.17 - 3.10 = -0.93 \text{ V}$$

## **References**

1. Giannakopoulou, T., et al., *Tailoring the energy band gap and edges' potentials of g-C<sub>3</sub>N<sub>4</sub>/TiO<sub>2</sub> composite photocatalysts for NO<sub>x</sub> removal*. Chemical Engineering Journal, 2017. **310**: p. 571-580.



2. Sahoo, P.P., B. Zoellner, and P.A. Maggard, *Optical, electronic, and photoelectrochemical properties of the p-type Cu<sub>3-x</sub>VO<sub>4</sub> semiconductor*. *Journal of Materials Chemistry A*, 2015. **3**(8): p. 4501-4509.
3. Hong, X., W. Yu, and D. Chung, *Electric permittivity of reduced graphite oxide*. *Carbon*, 2017. **111**: p. 182-190.
